# Supplementary material for: Basement membrane proteoglycans: from cellar to ceiling
Source: Springer Nature journal article supplement (doi:10.1038/nrm1702), 2005-08-01
Supplement: 41580_2005_BFnrm1702_MOESM1_ESM.pdf [file 41580_2005_BFnrm1702_MOESM1_ESM.pdf]

## S1 | Genetics of collagen XVIII, XV and perlecan

| Genetics                                                                         | Genotype and mutant forms                                                                                          | Phenotype                                                                                                                                                                                                                                                                                                                                        |
|----------------------------------------------------------------------------------|--------------------------------------------------------------------------------------------------------------------|--------------------------------------------------------------------------------------------------------------------------------------------------------------------------------------------------------------------------------------------------------------------------------------------------------------------------------------------------|
| <b>Collagen XVIII</b><br>Human: <i>Knobloch</i> syndrome                         | Autosomal recessive, mutations in the <i>COL18A1</i> gene and truncation of the short form of collagen XVIII       | High myopia, vitreoretinal degeneration with retinal detachment, macular abnormalities and occipital encephalocele <sup>1</sup>                                                                                                                                                                                                                  |
| Mouse: Knockout                                                                  | Null mutation                                                                                                      | Delay in postnatal regression of retinal hyaloid vessels, abnormal outgrowth of retinal vessels, accumulation of deposits in retinal pigment epithelium and reduced visual function <sup>2,3</sup> . Enhanced angiogenic response in aortic explants <sup>4</sup> . Hydrocephalus and dilation of brain ventricles, BM broadening <sup>5</sup> . |
| Mouse: Transgene                                                                 | Overexpression of endostatin in lens and skin driven by keratin 14 promoter                                        | Cataracts and skin BM abnormalities <sup>6</sup>                                                                                                                                                                                                                                                                                                 |
| <b>Collagen XVIII/ApoE</b><br>Mouse: Double knockout                             | Double null mutation                                                                                               | Enhanced neovascularization and vascular permeability in atherosclerosis <sup>7</sup>                                                                                                                                                                                                                                                            |
| <b>Collagen XV</b><br>Mouse: Knockout                                            | Null mutation                                                                                                      | Viable and fertile; reduced inotropic response to cardiac perfusion; exercise-induced cardiac injury <sup>8</sup>                                                                                                                                                                                                                                |
| <b>Collagen XVIII/XV</b><br>Mouse: Double knockout                               | Double null mutation                                                                                               | Viable and fertile; phenotypes similar to the individual knockouts, indicating separate biological roles                                                                                                                                                                                                                                         |
| <b>Collagen XVIII</b><br><i>C. elegans</i> : <i>cle-1</i>                        | Deletion of the C-terminal NC1 domain and other mutant forms                                                       | Defects in cell migration and axon guidance <sup>9</sup> , and abnormal neuromuscular structure <sup>10</sup>                                                                                                                                                                                                                                    |
| <b>Perlecan</b><br>Human<br>Dyssegmental Dysplasia, Silver-Handmaker type (DDSH) | Autosomal recessive, deletions or point mutations produce truncated, non-secreted/non-functional perlecan          | Lethal skeletal dysplasia characterized by anisodromy and micromelia <sup>11,12</sup>                                                                                                                                                                                                                                                            |
| Schwartz–Jampel Syndrome (SJS)                                                   | Homozygous missense and splicing mutations produce truncated partially functional or reduced wild-type perlecan    | Non-lethal, myotonia, chondrodysplasia <sup>13,14</sup>                                                                                                                                                                                                                                                                                          |
| Mouse: Knockout                                                                  | Null mutation                                                                                                      | Mostly embryonic lethal with severe cephalic and cartilage abnormalities; complete transposition of aorta and pulmonary artery, and abnormal attachment of coronary arteries <sup>15-18</sup>                                                                                                                                                    |
| Deletion of exon 3 ( <i>Hspg2</i> <sup>Δ3/Δ3</sup> )                             | Homozygous deletion mutant. Loss of HS attachment sites in domain I, but remaining protein core is fully expressed | Viable and fertile. Small eyes with perinatal degeneration of lens. <i>Col18a1</i> <sup>-/-</sup> , <i>Hspg2</i> <sup>Δ3/Δ3</sup> double mutants show accelerated lens degeneration <sup>19</sup> , increased stenosis in injured carotid artery <sup>20</sup> , and impaired angiogenesis and tumour growth <sup>21</sup>                       |
| <i>Drosophila melanogaster</i> ( <i>Trol</i> (terribly reduced optical lobes))   | Multiple deletion mutants                                                                                          | Lethal, reduced optical lobes and abnormal imaginal discs, abnormal proliferation of neuroblasts and modulation of FGF and Hedgehog <sup>22,23</sup>                                                                                                                                                                                             |
| <i>Caenorhabditis elegans</i> ( <i>Unc-5</i> (uncoordinated phenotype))          | Null mutation<br><br>Mutations in exons 16, 17 and 18 affecting some, but not all, <i>Unc-52</i> isoforms          | Pat (paralyzed, arrested at twofold); lethal<br><br>Larvae move normally, adults paralyzed owing to progressive disruption of body wall <sup>24</sup> . Abnormal gonadogenesis owing to deregulation of several growth factor signalling pathways <sup>25</sup>                                                                                  |

BM, basement membrane; FGF, fibroblast growth factor; NC1, non-collagenous domain-1.

1. Sertie, A. L. *et al.* Collagen XVIII, containing an endogenous inhibitor of angiogenesis and tumor growth, plays a critical role in the maintenance of retinal structure and in neural tube closure (Knobloch syndrome). *Human Mol. Gen.* **9**, 2051-2058 (2000).
2. Fukai, N. *et al.* Lack of collagen XVIII/endostatin results in eye abnormalities. *EMBO J.* **21**, 1535-1544 (2002).
3. Marnaros, A. G. *et al.* Collagen XVIII/endostatin is essential for vision and retinal pigment epithelial function. *EMBO J.* **23**, 89-99 (2004).
4. Li, Q. & Olsen, B. R. Increased angiogenic response in aortic explants of collagen XVIII/endostatin-null mice. *Am. J. Pathol.* **165**, 415-424 (2004).
5. Utriainen, A. *et al.* Structurally altered basement membranes and hydrocephalus in a type XVIII collagen deficient mouse line. *Human Mol. Gen.* **13**, 2089-2099 (2004).
6. Elamaa, H., Sormunen, R., Rehn, M., Soininen, R., & Pihlajaniemi, T. Endostatin overexpression specifically in the lens and skin leads to cataract and ultrastructural alterations in basement membranes. *Am. J. Pathol.* **166**, 221-229 (2004).
7. Moulton, K. S. *et al.* Loss of collagen XVIII enhances neovascularization and vascular permeability in atherosclerosis. *Circulation* **110**, 1330-1336 (2004).
8. Eklund, L. *et al.* Lack of type XV collagen causes a skeletal myopathy and cardiovascular defects in mice. *Proc. Natl. Acad. Sci. USA* **98**, 1194-1199 (2001).
9. Ackley, B. D. *et al.* The NC1/endostatin domain of *Caenorhabditis elegans* type XVIII collagen affects cell migration and axon guidance. *J. Cell Biol.* **152**, 1219-1232 (2001).
10. Ackley, B. D. *et al.* The basement membrane components nidogen and type XVIII collagen regulate organization of neuromuscular junctions in *Caenorhabditis elegans*. *J. Neurosci.* **23**, 3577-3587 (2003).
11. Arikawa-Hirasawa, E. *et al.* Dyssegmental dysplasia, Silverman-Handmaker type, is caused by functional null mutations of the perlecan gene. *Nature Genet.* **27**, 431-434 (2001).
12. Arikawa-Hirasawa, E., Wilcox, W. R., & Yamada, Y. Dyssegmental dysplasia, Silverman-Handmaker type: unexpected role of perlecan in cartilage development. *Am. J. Med. Genet.* **106**, 254-257 (2001).
13. Nicole, S. *et al.* Perlecan, the major proteoglycan of basement membranes, is altered in patients with Schwartz-Jampel syndrome (chondrodystrophic myotonia). *Nature Genet.* **26**, 480-483 (2000).
14. Arikawa-Hirasawa, E. *et al.* Structural and functional mutations of the perlecan gene cause Schwartz-Jampel syndrome, with myotonic myopathy and chondrodysplasia. *Am. J. Hum. Genet.* **70**, 1368-1375 (2002).
15. Costell, M. *et al.* Perlecan maintains the integrity of cartilage and some basement membranes. *J. Cell Biol.* **147**, 1109-1122 (1999).
16. Arikawa-Hirasawa, E., Watanabe, E., Takami, H., Hassell, J. R., & Yamada, Y. Perlecan is essential for cartilage and cephalic development. *Nature Genet.* **23**, 354-358 (1999).
17. Costell, M. *et al.* Hyperplastic conotruncal endocardial cushions and transposition of great arteries in perlecan-nullmice. *Circ. Res.* **91**, 158-164 (2002).
18. González-Iriarte, M. *et al.* Development of the coronary arteries in a murine model of transposition of great arteries. *J. Mol. Cell. Cardio.* **35**, 795-802 (2003).
19. Rossi, M. *et al.* Heparan sulfate chains of perlecan are indispensable in the lens capsule but not in the kidney. *EMBO J.* **22**, 236-245 (2003).
20. Tran, P.-K. *et al.* Increased intimal hyperplasia and smooth muscle cell proliferation in transgenic mice with heparan sulfate-deficient perlecan. *Circ. Res.* **94**, 550-558 (2004).
21. Zhou, Z. *et al.* Impaired angiogenesis, delayed wound healing and retarded tumor growth in perlecan heparan sulfate-deficient mice. *Cancer Res.* **64**, 4699-4702 (2004).
22. Voigt, A., Pflanz, R., Schafer, U., & Jackle, H. Perlecan participates in proliferation activation of quiescent *Drosophila* neuroblasts. *Dev. Dyn.* **224**, 403-412 (2002).
23. Park, Y. *et al.* *Drosophila* perlecan modulates FGF and hedgehog signals to activate neural stem cell division. *Dev. Biol.* **253**, 247-257 (2003).
24. Mullen, G. P., Rogalski, T. M., Bush, J. A., Gorji, P. R., & Moerman, D. G. Complex patterns of alternative splicing mediate the spatial and temporal distribution of perlecan/UNC-52 in *Caenorhabditis elegans*. *Mol. Biol. Cell* **10**, 3205-3221 (1999).
25. Merz, D. C., Alves, G., Kawano, T., Zheng, H., & Culotti, J. G. UNC-52/perlecan affects gonadal leader cell migrations in *C.elegans* hermaphrodites through alterations in growth factor signaling. *Dev. Biol.* **256**, 173-186 (2003).
